# Supplementary material for: Modulating stem cell–chondrocyte interactions for cartilage repair using combinatorial extracellular matrix-containing hydrogels
Source: Royal Society of Chemistry journal article supplement (doi:10.1039/c6tb01583b), 2016-01-01
Supplement: c6tb01583b2.pdf [file c6tb01583b2.pdf]

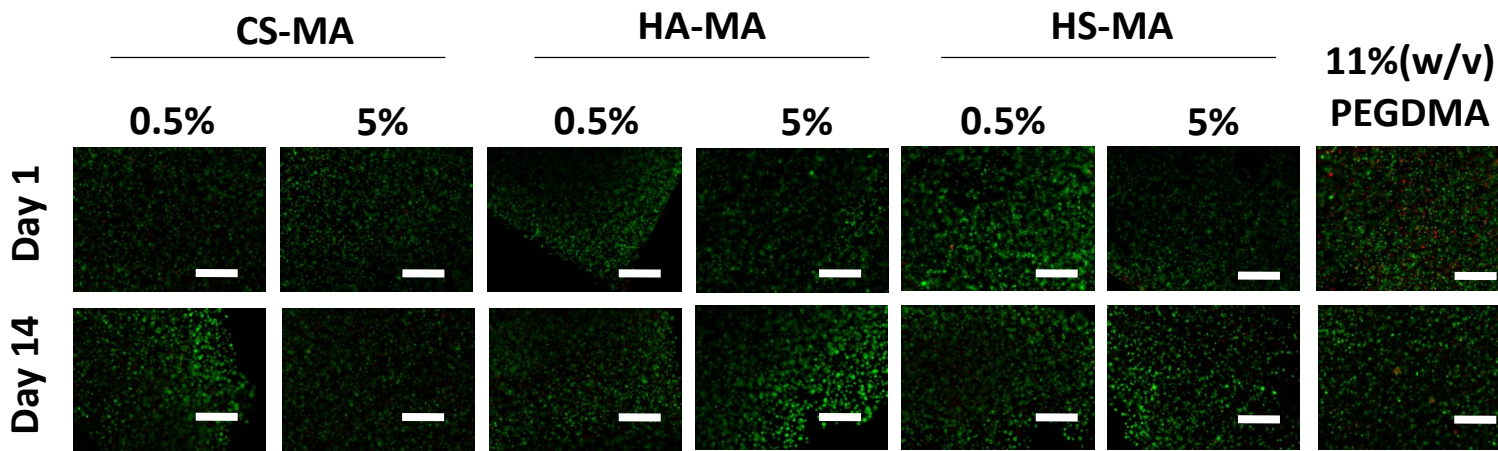

Figure S1: Neonatal chondrocyte (NChon) viability assayed via the LIVE/DEAD kit on day 1 and day 14 after encapsulation in 11% PEGDMA hydrogels. ECM molecules were added to the hydrogels as indicated. Scale bar, 400  $\mu\text{m}$ .
