# Supplementary material for: Modulating stem cell–chondrocyte interactions for cartilage repair using combinatorial extracellular matrix-containing hydrogels
Source: Royal Society of Chemistry journal article supplement (doi:10.1039/c6tb01583b), 2016-01-01
Supplement: c6tb01583b3.pdf [file c6tb01583b3.pdf]

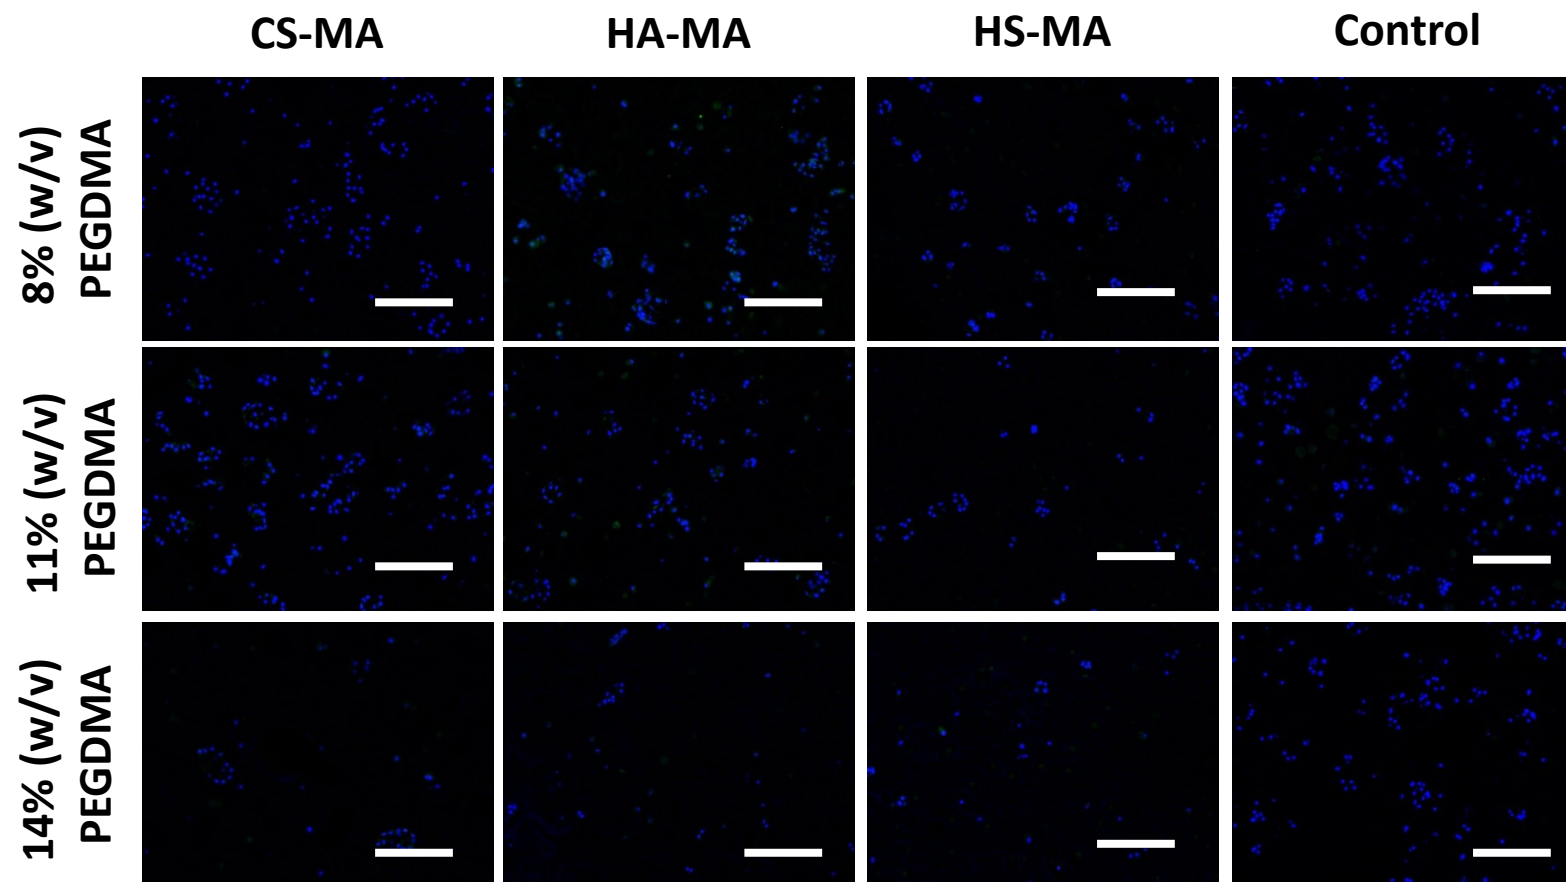

Figure S2: Effects of mechanical stiffness and type of ECM on collagen X secretion, as shown by immunostaining. Only hydrogels containing 5% (w/v) CS-MA, HA-MA, or HS-MA are shown. Note that the green channel was color-boosted five-fold versus the staining for collagen I and collagen II depicted in figures 4 and 5 of the main text. Scale bars, 200  $\mu$ m.
