# Supplementary material for: Modulating stem cell–chondrocyte interactions for cartilage repair using combinatorial extracellular matrix-containing hydrogels
Source: Royal Society of Chemistry journal article supplement (doi:10.1039/c6tb01583b), 2016-01-01
Supplement: c6tb01583b4.pdf [file c6tb01583b4.pdf]

| Polymer                                  | Reagents                             |                    |                            |           |
|------------------------------------------|--------------------------------------|--------------------|----------------------------|-----------|
|                                          | Chondroitin sulfate sodium salt (mg) | NHS (mg)           | EDC (mg)                   | AMEA (mg) |
| Chondroitin sulfate methacrylate (CS-MA) | 1000                                 | 53.2               | 177.1                      | 76.5      |
| Polymer                                  | Reagents                             |                    |                            |           |
|                                          | Heparan sodium salt (mg)             | NHS (mg)           | EDC (mg)                   | AMEA (mg) |
| Heparan sulfate methacrylate (HS-MA)     | 1000                                 | 43.9               | 146.3                      | 63.2      |
| Polymer                                  | Reagents                             |                    |                            |           |
|                                          | Sodium hyaluronate (mg)              | Triethylamine (mg) | Glycidyl methacrylate (mg) |           |
| Hyaluronic acid methacrylate (HA-MA)     | 1000                                 | 2700               | 3800                       |           |

**Table S1:** Amount of reagents needed for the synthesis of methacrylated ECM molecules. NHS: N-hydroxysuccinimide. EDC: 1-ethyl-3-(3-dimethylaminopropyl)-carbodiimide. AEMA: 2-aminoethyl methacrylate
