# Supplementary material for: Modulating stem cell–chondrocyte interactions for cartilage repair using combinatorial extracellular matrix-containing hydrogels
Source: Royal Society of Chemistry journal article supplement (doi:10.1039/c6tb01583b), 2016-01-01
Supplement: c6tb01583b5.pdf [file c6tb01583b5.pdf]

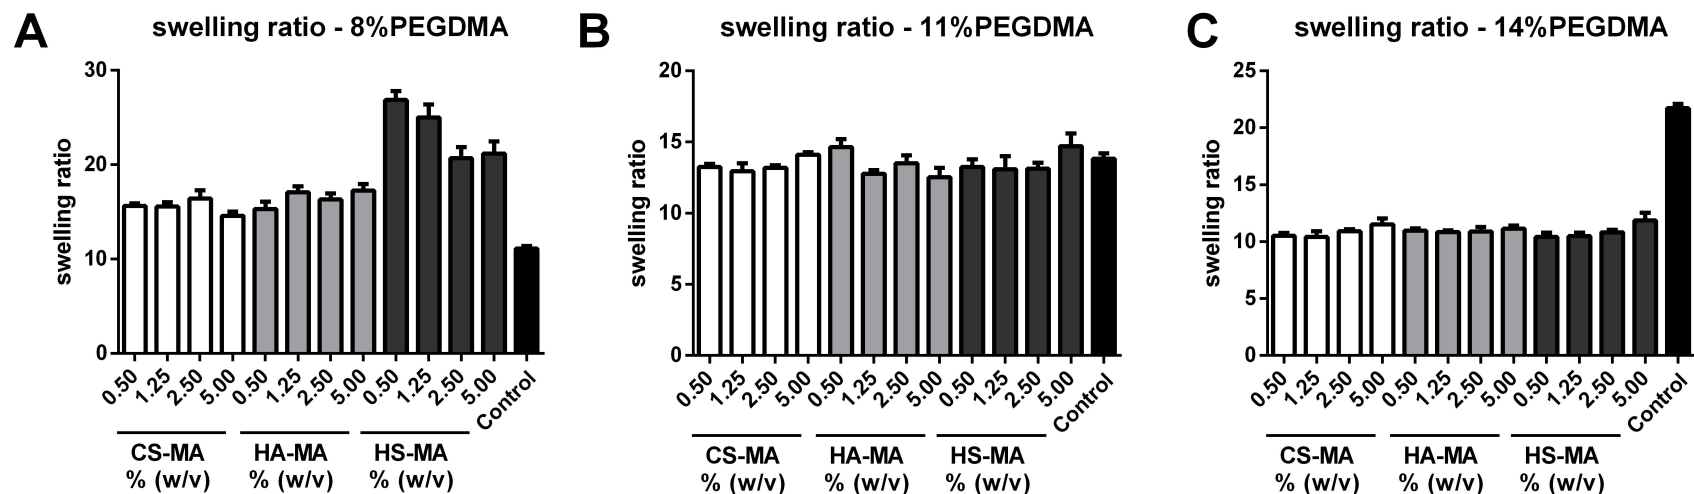

Figure S3: Swelling ratio of combinatorial hydrogels containing varying concentration of PEGDMA (8%, 11% and 14%) (w/v), varying ECM types (CS-MA, HA-MA and HS-MA), and varying ECM concentrations (0.5%, 1.25%, 2.5%, 5%). PEGDMA hydrogels that do not contain any ECM were included as controls.
